# Supplementary material for: Variability and long-term changes of tropical cold point temperature and water vapor
Source: Copernicus journal article supplement (doi:10.5194/egusphere-2024-168), 2024-01-25
Supplement: Supplementary file [file egusphere-2024-168-AC2-supplement.pdf]

Dear referees,

*We thank the reviewers for their valuable comments which have helped us to improve the paper in revision. We have changed the manuscript according to the comments listed below. Most importantly, we have updated SWOOSH v2.6 to v2.7, adjusted all figures and discussions, improved the hatching to display significance, and improved the overall discussion and conclusion section. Comments are reproduced below, followed by our responses in italics.*

**Anonymous Referee #2:**

This work uses GNSS-RO satellite data, with a very high vertical resolution to study the trend of the tropical tropopause layer (TTL) during the past 20 years and uses SWOOSH homogenized satellite data and MLS satellite data to study the trend of water vapor. This paper is well structured and almost all points are clearly explained. The trend was studied in terms of different location and seasons, and the authors tried to explore the role of radiation and dynamics in the observed trend. I recommend a minor revision before accepting this paper.

Major comment:

The major comment of this paper is regarding the conclusion ‘overall observed warming of the cold point is due to radiative effects, and seasonal signals and zonal asymmetries are due to dynamics’ in line 383, section 5. I agree with the analysis in section 3, and the conclusion that ‘cold point warming is connected to patterns of enhanced and reduced upper troposphere warming via some regional dynamical or radiative processes’. However, this does not necessarily lead to the conclusion in line 383. It could only be drawn when the authors analyzed (1) the seasonality and location of the BDC, (2) the overall trend of the BDC, (3) the seasonality and location of the convection, and (4), the overall trend of the convection. The authors do not provide the location/seasonality/overall trend of the Brewer-Dobson circulation (dynamics), so it is hard to conclude that the BDC are not accounting for the overall trend and instead just the seasonality and location. The authors also listed previous works that concerning the overall BDC trend in lines 354-369, and this may contribute to the overall trend of the TTL temperature. I don’t understand why the conclusion is ‘it explains the seasonality’, instead of the overall trend.

*Thanks for pointing this out. Indeed, our conclusion here was not correct and we have changed the text so that it now states that the trend is consistent with radiative effects found in models and with a weakening of the BDC derived from satellite observations. The last paragraph of the discussion and summary now states:*

*‘Overall, the here identified warming of the cold point is consistent with model simulations which attribute the warming trends to radiative effects. At the same time, the cold point warming is consistent with a potential weakening of the BDC upwelling in the tropical lower stratosphere. Some observations such as satellite temperatures suggest such weakened upwelling; however, these trends show large uncertainties and disagree with model simulations. Seasonal signals and zonal asymmetries in cold point temperature and height*

*trends might be related to dynamical responses to the enhanced moist heating in the upper troposphere, changing convection or variations in the trends of the stratospheric BDC.'*

Minor comments:

Line 76: the Brewer-Dobson circulation also plays an important role, see major comments.

*We have modified the text accordingly.*

Line 81: "A very high vertical resolution": it will be better if the authors provide an estimated number of the vertical resolution.

*We have added the following sentence to section 2.1: 'The vertical resolution of GNSS-RO temperature data is variable, ranging from ~1 km in regions of constant stratification down to 100–200 m where the biggest stratification gradients occur, e.g., at a very sharp tropopause (Gorbunov et al., 2004).'*

Line 129: 30°x10°: please clarify what is latitude and what is longitude.

*This is a 30°×10° longitude-latitude grid. We have modified the text accordingly.*

Line 153: SAOD: this is the first time that the term "SAOD" is used, please define this abbreviation.

*We have modified the text accordingly.*

Line 252: SWOOSH result is very different from MLS, which uses the MLS 4.2 with a drift problem, but it is also a homogenized data and has its strength when comparing with MLS. How much of the difference between SWOOSH is due to MLS 4.2, and how much is from other satellite data? For example, the authors can compare the trend of SWOOSH data, MLS 4.2, and MLS 5.0.

*Thanks for pointing this out. We realized that made a mistake by including SWOOSH v2.6 (which uses MLS v4.2). Given that MLS4.2 has the known drift problem, we prefer to include SWOOSH v2.7 (which uses MLS v5.1) and changed all figures and corresponding text accordingly. Differences that can be seen in the new version of our figures can be attributed to SWOOSH being a homogenized data set that also uses information from other satellite instruments and is given at a different horizontal resolution. Trends in SWOOSH and MLS show similar values and spatial/seasonal patterns with SWOOSH trends being smoother with smaller peak values.*

Line 309: "due to the influence of other seasonal signals in the middle atmosphere": like CH<sub>4</sub>?

*Indeed, this could be expected to be one of the most important factors. We have added 'such as the variability of water vapor production from methane' to the sentence.*

Line 385: 'seemed to be' is too vague. See major comments.

*We have changed the last paragraph of the discussion section including this sentence, see answer above.*
